# Supplementary material
Source: publisher figshare collection journal article supplement (https://sage.figshare.com/ndownloader/files/23949936)
Supplement: Supplementary file 1 [file 23949936]

# Correlation of Surgical Specimens with Imaging: Pre-Intervention Survey

Please complete the survey below by October 17, 2018 at 7:45 a.m.

There is an option to "Save & Return Later" should you need more time to complete the survey.

Thank you!

- 
- 1) BWH Employee ID Number (9 digit # on back of ID card)

(Note: Your answers will be immediately de-identified at the time of data input and analysis. BWH Employee ID#s are used only to match pre- and post-intervention survey answers for comparison and analysis.)

---

Study Fact Sheet (please read before continuing with the survey)

[Attachment: "IRB Application - Specimen Radiographs - Fact Sheet.pdf"]

## Section I. For the following questions, please rate your level of confidence.

### How confident are you...

|                                                                                                                           | Not at all confident  | Slightly confident    | Moderately confident  | Quite confident       | Extremely confident   |
|---------------------------------------------------------------------------------------------------------------------------|-----------------------|-----------------------|-----------------------|-----------------------|-----------------------|
| 2) ...in your ability to interpret specimen radiographs in general?                                                       | <input type="radio"/> |
| 3) ...in your ability to interpret breast specimen radiographs?                                                           | <input type="radio"/> |
| 4) ...in your ability to interpret pre-surgery breast imaging studies (e.g. mammograms)?                                  | <input type="radio"/> |
| 5) ...in your ability to interpret musculoskeletal specimen radiographs?                                                  | <input type="radio"/> |
| 6) ...in your ability to interpret pre-surgery musculoskeletal imaging studies (e.g. MRI of bone and soft tissue tumors)? | <input type="radio"/> |
| 7) ...in your ability to interpret head and neck specimen radiographs?                                                    | <input type="radio"/> |
| 8)                                                                                                                        |                       |                       |                       |                       |                       |

- |                                                                                                  |                       |                       |                       |                       |                       |
|--------------------------------------------------------------------------------------------------|-----------------------|-----------------------|-----------------------|-----------------------|-----------------------|
| ...in your ability to interpret pre-surgery head and neck imaging studies (e.g. CT of the neck)? | <input type="radio"/> |
| 9) ...in knowing which types of specimens typically necessitate a specimen radiograph?           | <input type="radio"/> |
| 10) ...in knowing what features of a specimen are ideally evaluated with a specimen radiograph?  | <input type="radio"/> |
| 11) ...that you have a systematic approach to interpreting a specimen radiograph?                | <input type="radio"/> |
| 12) ...in your ability to obtain a quality specimen radiograph?                                  | <input type="radio"/> |
| 13) ...in teaching others about how to OBTAIN a specimen radiograph?                             | <input type="radio"/> |
| 14) ...in teaching others about how to INTERPRET a specimen radiograph?                          | <input type="radio"/> |

## Section II. For the following questions, please rate your level of satisfaction.

### How satisfied are you...

- |                                                                                                                             | Not at all satisfied  | Slightly satisfied    | Moderately satisfied  | Quite satisfied       | Extremely satisfied   |
|-----------------------------------------------------------------------------------------------------------------------------|-----------------------|-----------------------|-----------------------|-----------------------|-----------------------|
| 15) ...with the training you have received up to this point (before October 17, 2018) in OBTAINING specimen radiographs?    | <input type="radio"/> |
| 16) ...with the training you have received up to this point (before October 17, 2018) in INTERPRETING specimen radiographs? | <input type="radio"/> |

### Section III. For the following questions, please rate the level of importance.

#### How important is...

|                                                                                                                                                                       | Not important         | Slightly important    | Moderately important  | Quite important       | Essential             |
|-----------------------------------------------------------------------------------------------------------------------------------------------------------------------|-----------------------|-----------------------|-----------------------|-----------------------|-----------------------|
| 17) ...communication and collaboration between radiologists and pathologists in evaluating specimens?                                                                 | <input type="radio"/> |
| 18) ...radiologic-pathologic correlation in rendering a diagnosis?                                                                                                    | <input type="radio"/> |
| 19) ...it to correlate a specimen radiograph with the pre-surgery imaging studies?                                                                                    | <input type="radio"/> |
| 20) ...it to view pre-surgery imaging studies to inform your gross examination and dissection in general?                                                             | <input type="radio"/> |
| 21) ...it to view pre-surgery imaging studies to inform your gross examination and dissection of breast specimens (e.g. lumpectomy, mastectomy)?                      | <input type="radio"/> |
| 22) ...it to view pre-surgery imaging studies to inform your gross examination and dissection of bone and soft tissue specimens (e.g. amputation, osseous resection)? | <input type="radio"/> |
| 23) ...it to view pre-surgery imaging studies to inform your gross examination and dissection of head and neck specimens (e.g. maxillectomy, mandibulectomy)?         | <input type="radio"/> |

## Section IV. For the following questions, please rate the level of frequency.

### How often...

|                                                                                                                                              | Almost never          | Once in a while       | Sometimes (e.g.<br>50% of the time) | Often                 | Almost always         |
|----------------------------------------------------------------------------------------------------------------------------------------------|-----------------------|-----------------------|-------------------------------------|-----------------------|-----------------------|
| 24) ...do you obtain a specimen radiograph of breast specimens?                                                                              | <input type="radio"/> | <input type="radio"/> | <input type="radio"/>               | <input type="radio"/> | <input type="radio"/> |
| 25) ...do you obtain a specimen radiograph of bone and soft tissue specimens?                                                                | <input type="radio"/> | <input type="radio"/> | <input type="radio"/>               | <input type="radio"/> | <input type="radio"/> |
| 26) ...do you obtain a specimen radiograph of head and neck specimens?                                                                       | <input type="radio"/> | <input type="radio"/> | <input type="radio"/>               | <input type="radio"/> | <input type="radio"/> |
| 27) ...do you include your interpretation of the specimen radiograph into your surgical pathology report?                                    | <input type="radio"/> | <input type="radio"/> | <input type="radio"/>               | <input type="radio"/> | <input type="radio"/> |
| 28) ...do you view pre-surgery imaging studies in general?                                                                                   | <input type="radio"/> | <input type="radio"/> | <input type="radio"/>               | <input type="radio"/> | <input type="radio"/> |
| 29) ...has viewing pre-surgery imaging studies helped in your dissection approach in general?                                                | <input type="radio"/> | <input type="radio"/> | <input type="radio"/>               | <input type="radio"/> | <input type="radio"/> |
| 30) ...do you view pre-surgery breast imaging studies (e.g. mammograms)?                                                                     | <input type="radio"/> | <input type="radio"/> | <input type="radio"/>               | <input type="radio"/> | <input type="radio"/> |
| 31) ...has viewing pre-surgery breast imaging studies (e.g. mammograms) helped in your dissection approach?                                  | <input type="radio"/> | <input type="radio"/> | <input type="radio"/>               | <input type="radio"/> | <input type="radio"/> |
| 32) ...do you view pre-surgery musculoskeletal imaging studies (e.g. MRI of bone and soft tissue tumors)?                                    | <input type="radio"/> | <input type="radio"/> | <input type="radio"/>               | <input type="radio"/> | <input type="radio"/> |
| 33) ...do you view pre-surgery imaging studies to aid in quantification of tumor necrosis in bone and soft tissue tumors?                    | <input type="radio"/> | <input type="radio"/> | <input type="radio"/>               | <input type="radio"/> | <input type="radio"/> |
| 34) ...has viewing pre-surgery musculoskeletal imaging studies (e.g. MRI of bone and soft tissue tumors) helped in your dissection approach? | <input type="radio"/> | <input type="radio"/> | <input type="radio"/>               | <input type="radio"/> | <input type="radio"/> |
| 35)                                                                                                                                          |                       |                       |                                     |                       |                       |

...do you view pre-surgery head and neck imaging studies (e.g. CT of the neck)?

☐☐☐☐☐

36) ...has viewing pre-surgery head and neck imaging studies (e.g. CT of the neck) helped in your dissection approach?

☐☐☐☐☐

## Section V.

**For each of the following six cases, review the specimen radiograph(s) and include your interpretation as you would in the gross description section of the surgical pathology report:**

Breast Case

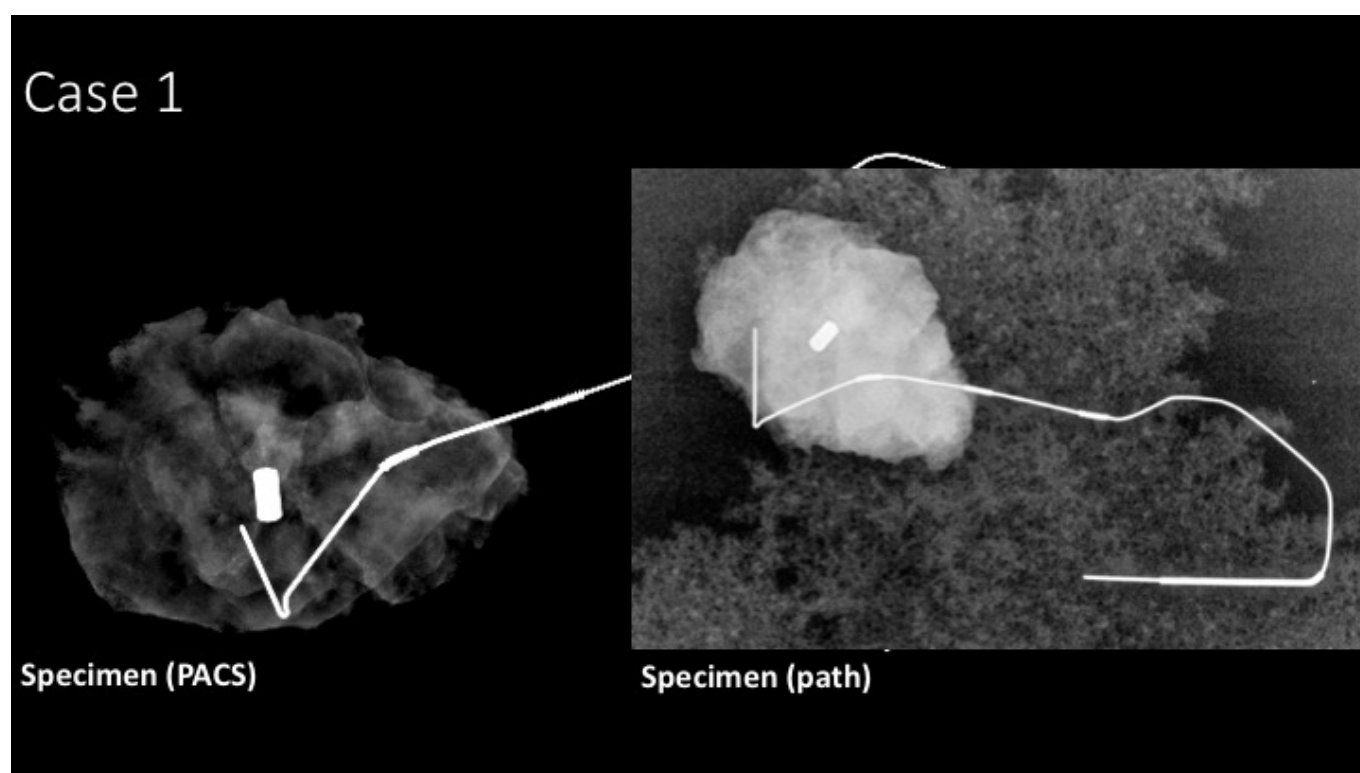

37) Interpretation of Case #1

## Breast Case

## Case 2

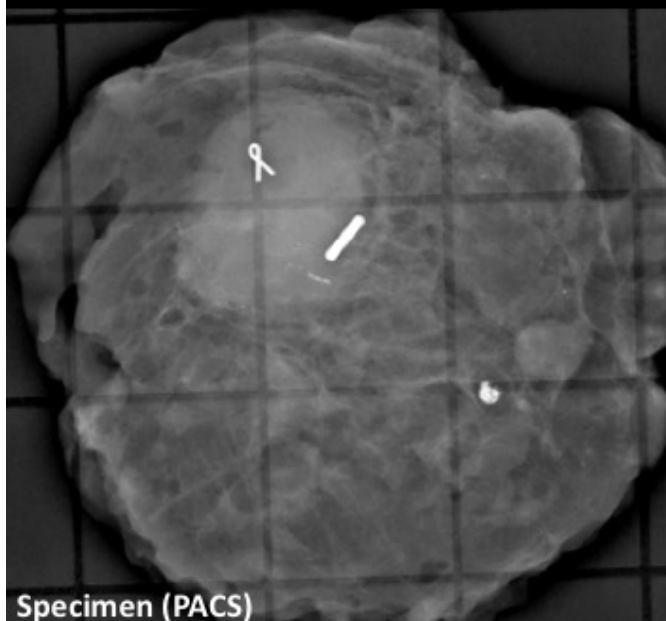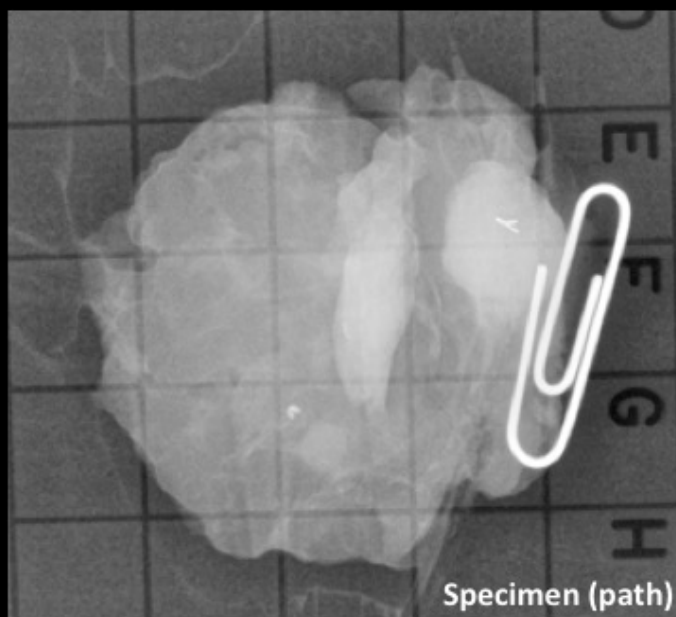

38) Interpretation of Case #2

## Bone and Soft Tissue Case

## Case 3

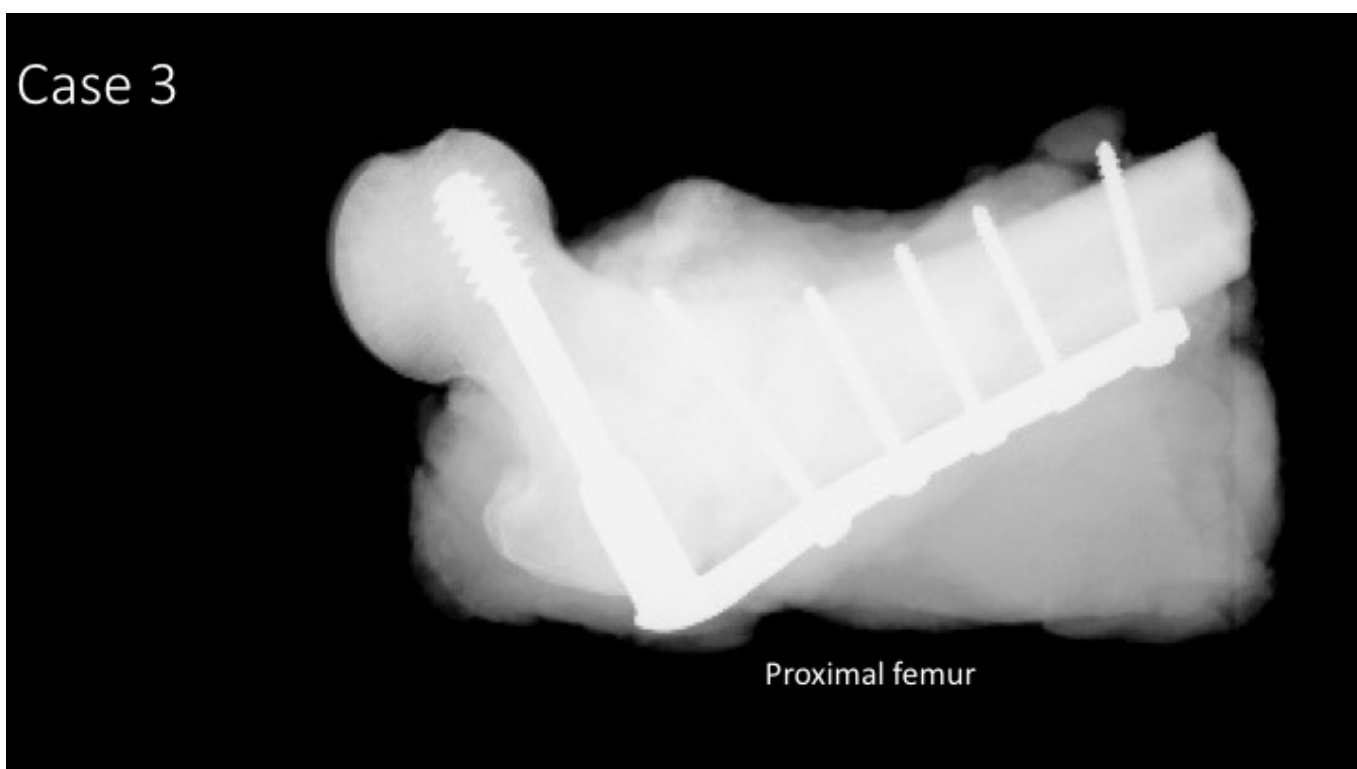

## 39) Interpretation of Case #3

## Bone and Soft Tissue Case

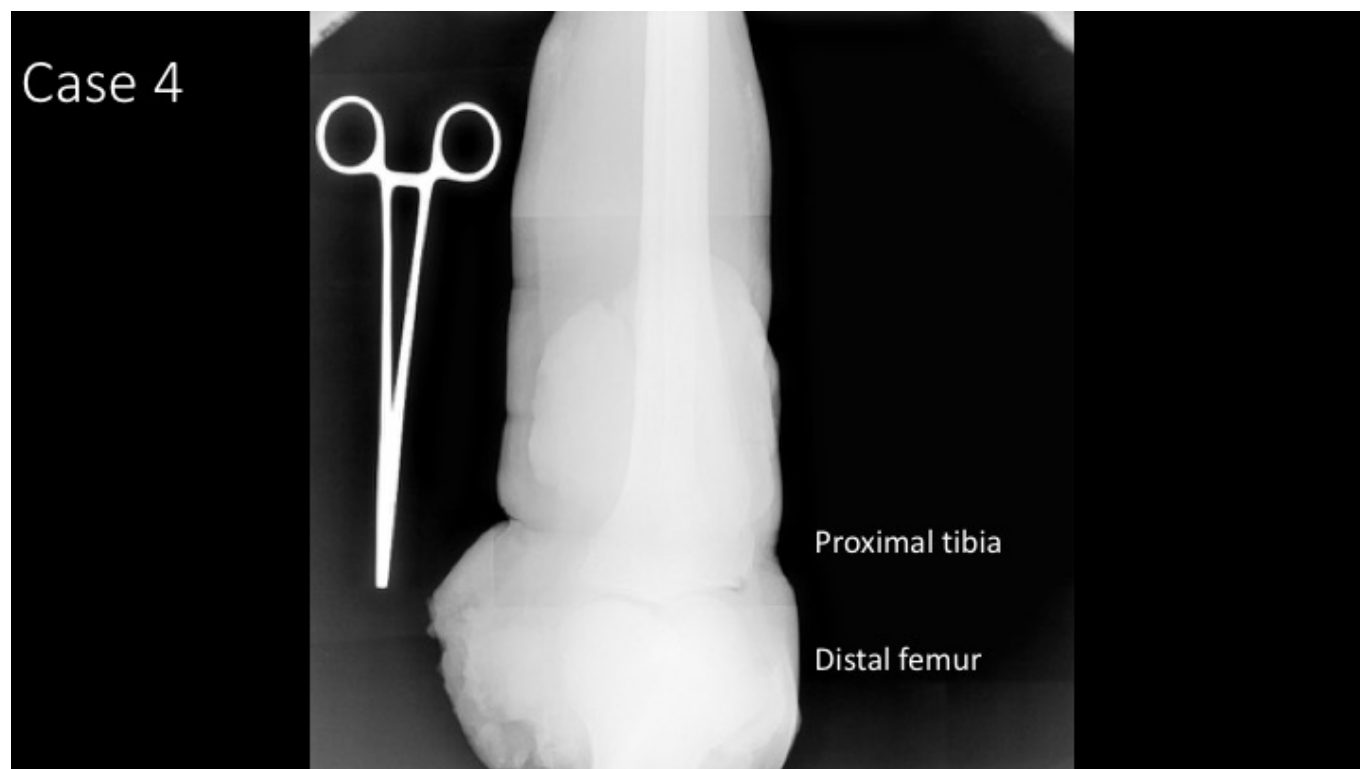

## 40) Interpretation of Case #4

## Head and Neck Case

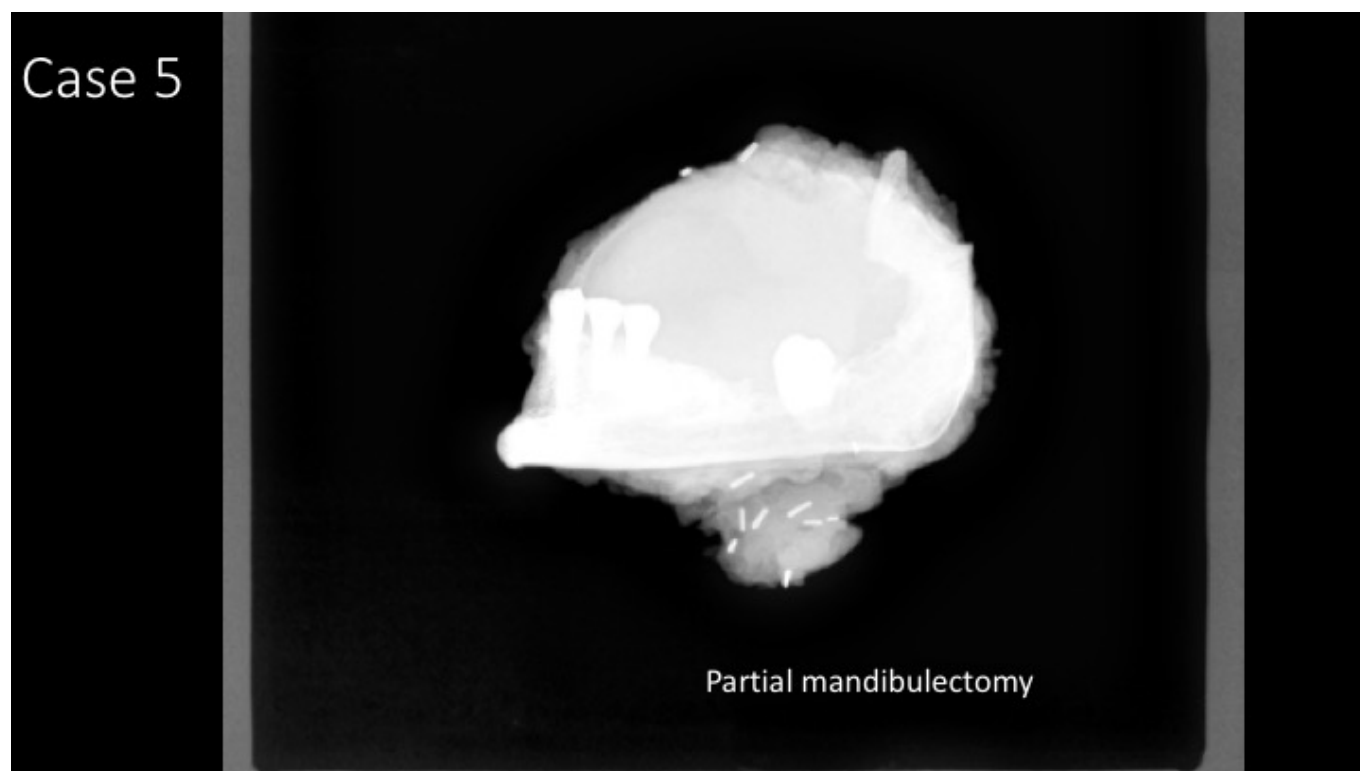

41) Interpretation of Case #5

---

Head and Neck Case

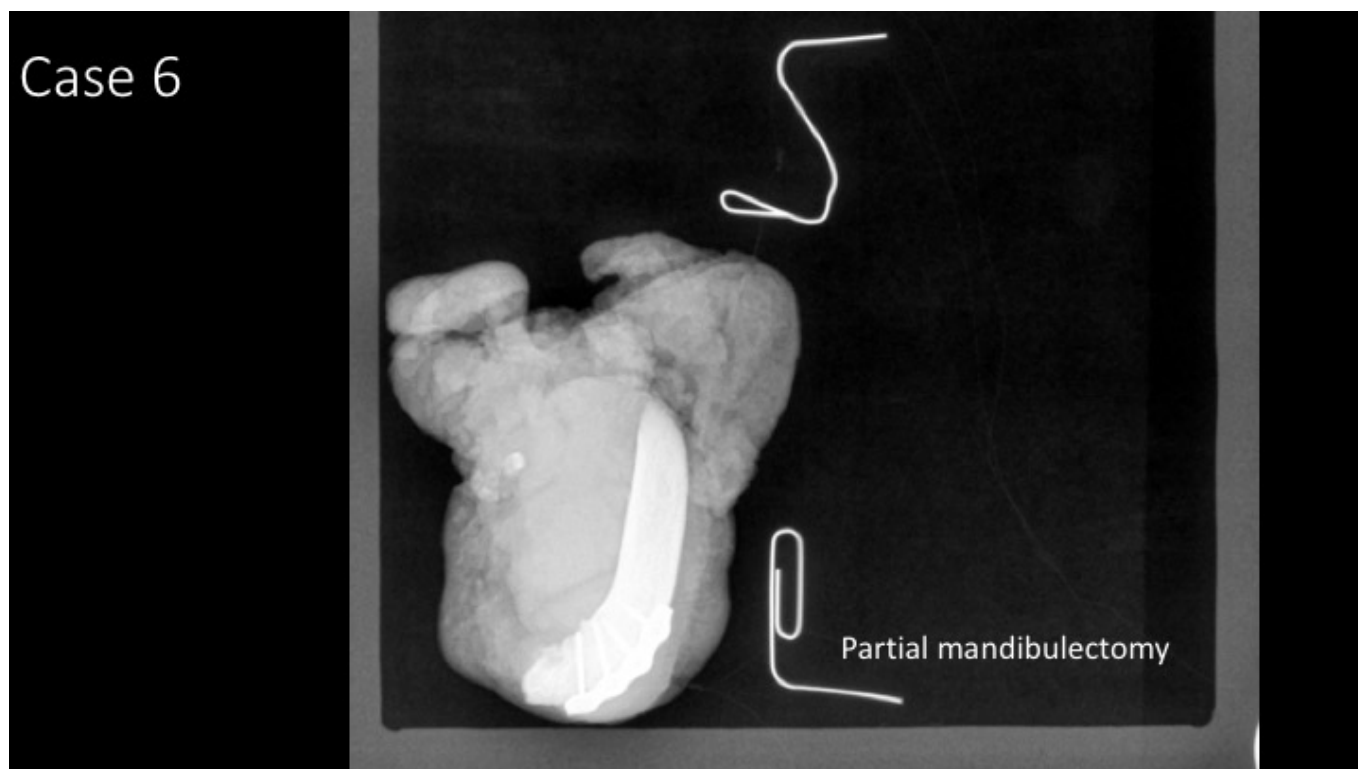

42) Interpretation of Case #6

---

## Section VI.

43) How interested are you in attending radiology-pathology correlation conferences?

☐ Not at all interested  
☐ Slightly interested  
☐ Moderately interested  
☐ Quite interested  
☐ Extremely interested

44) Your sex

☐ Male  
☐ Female  
☐ Other

45) Your age

---

46) Your graduate degree(s) (e.g. MD, PhD)

---

47) Your post-graduate year (e.g. PGY-1, PGY-4)

---

48) Your Pathology Residency Training Program (e.g. AP, CP, or AP/CP)

---



- 
- 49) Did you participate in a mandatory Radiology Core Clerkship in medical school? ☐ Yes  
☐ No
- 
- 50) If you did participate in a mandatory Radiology Core Clerkship in medical school, how was it structured? (e.g. 4 weeks, longitudinal/integrated) \_\_\_\_\_
- 
- 51) Did you participate in a Radiology Elective in medical school? ☐ Yes  
☐ No
- 
- 52) How many months of Pathology Elective(s) in medical school did you complete? (If you completed a Post-Sophomore Fellowship in Pathology, include that in your answer.) \_\_\_\_\_
- 
- 53) If you have any additional comments, please include them here: \_\_\_\_\_
